# Supplementary material for: Prognostic Value of Exercise Capacity in Incidence Diabetes: A Country With High Prevalence of Diabetes
Source: Research Square preprint supplement (doi:10.21203/rs.3.rs-1147869/v1), 2021-12-13
Supplement: Supplementary file 1 [file 78a6c97fa8cfbdb2b4016783.docx]

|  | Model (1) | | | Model (2) | | | Model (3) | | | Model (4A) | | | Model (4B) | | |
| --- | --- | --- | --- | --- | --- | --- | --- | --- | --- | --- | --- | --- | --- | --- | --- |
| AIC | 29837.872 | | | 29812.71 | | | 29749.162 | | | 29663.615 | | | 29647.187 | | |
| C-Statistics | 0.6253 | | | 0.6266 | | | 0.6412 | | | 0.6626 | | | 0.6639 | | |
| IAUC | 0.6161 | | | 0.6199 | | | 0.6336 | | | 0.666 | | | 0.6689 | | |
| NRI | 0.5109 | | | 0.2554 | | | 0.3419 | | | 0.0657 | | | 0.0457 | | |
| IDI | 0.0369 | | | 0.0023 | | | 0.004 | | | 0.0011 | | | 0.0009 | | |
|  | **HR** | **95% CI** | ***p*** | **HR** | **95% CI** | ***p*** | **HR** | **95% CI** | ***p*** | **HR** | **95% CI** | ***p*** | **HR** | **95% CI** | ***p*** |
| Age (years) | 1.03 | ( 1.03-1.03 ) | <.001 | 1.027 | ( 1.02-1.03 ) | <.001 | 1.027 | ( 1.02-1.03 ) | <.001 | 1.022 | ( 1.02-1.03 ) | <.001 | 1.021 | ( 1.02-1.03 ) | <0.001 |
| Gender Female vs Male | 0.947 | ( 0.86-1.05 ) | 0.291 | 0.983 | ( 0.89-1.09 ) | 0.738 | 0.958 | ( 0.86-1.06 ) | 0.421 | 0.802 | ( 0.72-0.90 ) | <.001 | 0.783 | ( 0.70-0.88 ) | <0.001 |
| BMI | 1.029 | ( 1.02-1.04 ) | <.001 | 1.029 | ( 1.02-1.04 ) | <.001 | 1.03 | ( 1.02-1.04 ) | <.001 | 1.022 | ( 1.01-1.03 ) | <.001 | 1.021 | ( 1.01-1.03 ) | <0.001 |
| Resting heart rate (bpm) | 1.004 | ( 1.00-1.01 ) | 0.008 | 1.005 | ( 1.00-1.01 ) | 0.001 | 1.005 | ( 1.00-1.01 ) | 0.001 | 1.004 | ( 1.00-1.01 ) | 0.012 | 1.003 | ( 1.00-1.01 ) | 0.059 |
| Cardiovascular risk factors |  |  |  |  |  |  |  |  |  |  |  |  |  |  |  |
| Hypertension |  |  |  | 1.125 | ( 1.01-1.25 ) | 0.027 | 1.081 | ( 0.97-1.21 ) | 0.173 | 1.021 | ( 0.91-1.15 ) | 0.726 | 1.021 | ( 0.91-1.15 ) | 0.720 |
| Hyperlipidemia |  |  |  | 1.229 | ( 1.10-1.37 ) | 0.000 | 1.401 | ( 1.25-1.56 ) | <.001 | 1.426 | ( 1.28-1.59 ) | <.001 | 1.428 | ( 1.28-1.59 ) | <0.001 |
| Smoking |  |  |  | 1.135 | ( 0.87-1.48 ) | 0.354 | 1.193 | ( 0.91-1.56 ) | 0.202 | 1.155 | ( 0.88-1.51 ) | 0.293 | 1.14 | ( 0.87-1.49 ) | 0.335 |
| Lung disease |  |  |  | 0.96 | ( 0.69-1.34 ) | 0.810 | 0.9 | ( 0.64-1.27 ) | 0.552 | 0.891 | ( 0.63-1.26 ) | 0.513 | 0.869 | ( 0.61-1.23 ) | 0.428 |
| Known CAD |  |  |  | 1.054 | ( 0.88-1.26 ) | 0.560 | 1.113 | ( 0.92-1.34 ) | 0.259 | 1.128 | ( 0.94-1.36 ) | 0.201 | 1.143 | ( 0.95-1.37 ) | 0.157 |
| Known CHF |  |  |  | 0.55 | ( 0.33-0.93 ) | 0.025 | 0.475 | ( 0.28-0.81 ) | 0.006 | 0.436 | ( 0.26-0.74 ) | 0.002 | 0.438 | ( 0.26-0.74 ) | 0.002 |
| Medications |  |  |  |  |  |  |  |  |  |  |  |  |  |  |  |
| Statins |  |  |  |  |  |  | 0.437 | ( 0.35-0.54 ) | <.001 | 0.442 | ( 0.36-0.55 ) | <.001 | 0.442 | ( 0.36-0.55 ) | <0.001 |
| PPI |  |  |  |  |  |  | 1.45 | ( 1.16-1.80 ) | 0.001 | 1.409 | ( 1.13-1.76 ) | 0.002 | 1.407 | ( 1.13-1.75 ) | 0.002 |
| CCB |  |  |  |  |  |  | 1.032 | ( 0.82-1.30 ) | 0.787 | 1.053 | ( 0.84-1.33 ) | 0.659 | 1.048 | ( 0.83-1.32 ) | 0.691 |
| BB |  |  |  |  |  |  | 1.43 | ( 1.14-1.80 ) | 0.002 | 1.357 | ( 1.08-1.71 ) | 0.009 | 1.333 | ( 1.06-1.68 ) | 0.014 |
| ACEARB |  |  |  |  |  |  | 0.984 | ( 0.84-1.15 ) | 0.835 | 0.98 | ( 0.84-1.14 ) | 0.797 | 0.985 | ( 0.84-1.15 ) | 0.843 |
| Diuretic |  |  |  |  |  |  | 1.199 | ( 0.95-1.51 ) | 0.123 | 1.194 | ( 0.95-1.51 ) | 0.133 | 1.177 | ( 0.93-1.48 ) | 0.169 |
| METs (Categories) |  |  |  |  |  |  |  |  |  |  |  |  |  |  |  |
| METs 6-9 |  |  |  |  |  |  |  |  |  | 0.658 | ( 0.54-0.79 ) | <.001 |  |  |  |
| METs 10-11 |  |  |  |  |  |  |  |  |  | 0.89 | ( 0.75-1.05 ) | 0.170 |  |  |  |
| METs ≥ 12 |  |  |  |  |  |  |  |  |  | 0.57 | ( 0.46-0.71 ) | <.001 |  |  |  |
| METs (Continuous) |  |  |  |  |  |  |  |  |  |  |  |  | 0.917 | ( 0.90-0.94 ) | <0.001 |
| Chronotropic incompetence |  |  |  |  |  |  |  |  |  | 1.131 | ( 1.01-1.26 ) | 0.030 | 1.078 | ( 0.96-1.21 ) | 0.192 |
| Duke Risk Score |  |  |  |  |  |  |  |  |  |  |  |  |  |  |  |
| High Risk |  |  |  |  |  |  |  |  |  | 1.299 | ( 0.99-1.70 ) | 0.058 | 1.267 | ( 0.97-1.66 ) | 0.086 |
| Moderate Risk |  |  |  |  |  |  |  |  |  | 1.234 | ( 1.11-1.37 ) | <.001 | 1.199 | ( 1.08-1.33 ) | 0.001 |
